# Supplementary material
Source: PubMed Central journal article supplement (PMC2993424)
Supplement: 1008606107_pnas.201008606SI.pdf [file 1008606107_pnas.201008606SI.pdf]

# Supporting Information

Chen et al. 10.1073/pnas.1008606107

## SI Materials and Methods

**RNAi in *Drosophila* S2 Cells.** The experiments were carried out using a stable S2 cell line containing Flag-Mothers against decapentaplegic (Mad) controlled by a metallothionine promoter that is inducible by CuSO<sub>4</sub>. S2 cells were transfected with dsRNA using DharmaFect 4 (Thermo Scientific) following manufacturer's procedures. The transfection was repeated 4 d later. Forty-eight hours after the second dsRNA transfection, cells at a density of  $0.5 \times 10^6$  per well were seeded into 24-well plates, cultured overnight, and treated with 1 nM decapentaplegic (Dpp) for 1 h. To induce Flag-Mad expression, 0.5 mM CuSO<sub>4</sub> was added 30 min or 1 h before the Dpp treatment. Cells were harvested in RIPA buffer [50 mM Tris (pH 7.5), 150 mM NaCl, 1% (vol/vol) Nonidet P-40, 0.5% (wt/vol) sodium deoxycholate, 0.1% (wt/vol) SDS] and analyzed by Western blots.

**Generation of Constructs for Tagged Proteins. *Flag-Lis-1.*** The coding region of *Lisencephaly-1* (*Lis1*), which was amplified from a *Drosophila* ovarian cDNA library, was cloned into pENTR TOPO cloning vector and completely sequenced. These pENTR vectors subsequently were recombined with Flag-tagged destination vectors (Dr. T. Murphy, Carnegie Institution of Washington, Baltimore) using LR Clonase (Invitrogen).

***Punt-V5.*** PCR-amplified *punt* cDNA was cloned into the pSH vector at EcoR-I and Bam HI sites. The V5 tag is at the C terminus. The pSH vector is controlled by the metallothionine-inducible promoter.

***Thickveins-HA.*** The *thickveins* (*tkv*) coding region was PCR-cloned into the XhoI-XbaI site of pMK33, with an HA tag at the C terminus. Thk-HA also is an inducible system controlled by the metallothionine promoter.

***HA-Mad.*** The *mad* coding region was cloned into pMK33 at the KpnI-XbaI site, with the HA tag at the N terminus.

**Coimmunoprecipitation in S2 Cells.** S2 cells were transfected with cDNA expression vectors using Effectene (Qiagen). *Lis-1* cDNA was driven by an actin promoter; all other expression vectors were driven by metallothionine promoters and were induced by CuSO<sub>4</sub> (0.5 mM; 4 h). Cells were lysed in 0.5% (vol/vol) Nonidet P-40, 50 mM Hepes (pH 7.2), 100 mM KCL, 6.5% (vol/vol) glycerol, 1 mM Na<sub>3</sub>PO<sub>4</sub>, 20 mM Na pyrophosphate, 20 mM NaF, 20 mM beta-glycerophosphate, 0.5 mM DTT, and protease inhibitors. Immunoprecipitations were carried out overnight at 4 °C with anti-FLAG agarose beads (Sigma), anti-HA affinity matrix (Roche), and anti-V5 (Invitrogen) with protein A agarose beads (Roche). The beads were washed three times with the lysis buffer, and the bound proteins were subjected to SDS/PAGE and Western blot analysis. All coimmunoprecipitation experiments were performed at least three times.

**Immunofluorescence Staining.** S2 cells grown on coverslips were fixed by incubation with 4% (vol/vol) paraformaldehyde in PBS for 10 min at room temperature and permeabilized by 0.2% (vol/vol) Triton X-100 in PBS for 7 min. After blocking by 10% FBS in PBS for 1 h, anti-phospho-Smad1 (Cell Signaling) was added at 1:1,000 dilution and incubated at 4 °C overnight. Anti-rabbit IgG conjugated to Alexa 488 (Invitrogen) was used as the secondary antibody at 1:500 dilution. Coverslips were mounted by ProLong Gold (Invitrogen), and immunofluorescence images were acquired by confocal microscopy (Leica).

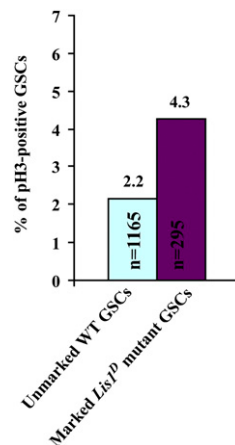

**Fig. S1.** Requirement of *Lis1* for M-phase progression of germline stem cells (GSCs). Phosphorylated histone H3 (pH3) staining was used to label mitotic control and *Lis1*-mutant GSCs. There appeared to be more *Lis1* mutant than control GSCs in the M phase.



**Table S1. *Hu Li-tai Shao (hts)* appears to be dispensable for maintaining GSC self-renewal in the *Drosophila* ovary**

| Genotype                                   | One week after clone induction     |              |                            | Two weeks after clone induction    |              |                            |
|--------------------------------------------|------------------------------------|--------------|----------------------------|------------------------------------|--------------|----------------------------|
|                                            | % of germaria carrying marked GSCs | normalized % | number of germaria counted | % of germaria carrying marked GSCs | normalized % | number of germaria counted |
|                                            | FRT <sub>42D</sub> control         | 21.8         | 100                        | 165                                | 20.0         | 91.7                       |
| FRT <sub>42D</sub> <i>hts</i> <sup>1</sup> | 22.7                               | 100          | 110                        | 27.5                               | 121.1        | 127                        |
| FRT <sub>42D</sub> <i>hts</i> <sup>2</sup> | 26.2                               | 100          | 99                         | 23.1                               | 88.1         | 91                         |

The control and mutant GSC clones are marked by *armadillo-lacZ*. *hts*<sup>1</sup> and *hts*<sup>2</sup> represent strong/null and moderate alleles, respectively (1). *hts*<sup>1</sup> mutant GSCs were shown previously to have misoriented spindles (2). FRT42D is Flippase-recognition target at the chromosomal location 42D.

1. Yue L, Spradling AC (1992) hu-li tai shao, a gene required for ring canal formation during *Drosophila* oogenesis, encodes a homolog of adducin. *Genes Dev* 6(12B):2443–2454.
2. Deng W, Lin H (1997) Spectrosomes and fusomes anchor mitotic spindles during asymmetric germ cell divisions and facilitate the formation of a polarized microtubule array for oocyte specification in *Drosophila*. *Dev Biol* 189:79–94.
